# Supplementary material
Source: publisher figshare collection journal article supplement (https://rs.figshare.com/ndownloader/files/14026160)
Supplement: Supplementary file 1 [file 14026160]

study.n,references,mainland.island,dist.mainland,island.area,lat,species,common.name,family,order,k,sample.size,mev,modal.clutch,average.body.size,nest.type
66,"Freymann, B. P., & Schuchmann, K. L. (2008). Postnatal growth rates of hummingbirds: review and new records.ÊThe Wilson Journal of Ornithology,Ê120(4), 884-887.",Island,11,5008.7,10.4,Glaucis_hirsutus,Rufous-breasted Hermit,Trochilidae,Apodiformes,0.251,1,1,2,6.75,cup
66,"Freymann, B. P., & Schuchmann, K. L. (2008). Postnatal growth rates of hummingbirds: review and new records.ÊThe Wilson Journal of Ornithology,Ê120(4), 884-887.",Island,340,640,13.85,Eulampis_jugularis,Purple-throated Carib,Trochilidae,Apodiformes,0.273,3,0.333333333,2,9.5,cup
66,"Freymann, B. P., & Schuchmann, K. L. (2008). Postnatal growth rates of hummingbirds: review and new records.ÊThe Wilson Journal of Ornithology,Ê120(4), 884-887.",Island,570,900,16.2,Orthorhyncus_cristatus,Antillean Crested Hummingbird,Trochilidae,Apodiformes,0.27,2,0.5,2,3.75,cup
74,"Muir, A. & Butler, A. L. (1925). The nesting of the Emerald Hummingbird (Saucerottia tobaci eythronota) in Trinidad. Ibis, 67, 648-654. ",Island,11,5008.7,10.4,Amazilia_tobaci,Copper-rumped Hummingbird,Trochilidae,Apodiformes,0.264,2,0.5,2,4.1,cup
97,"Hartley, I. R., Royle, N. J., & SHEPHERD, M. (2000). Growth rates of nestling Corn Buntings Miliaria calandra in relation to their sex.ÊIbis,Ê142(4), 668-671.",Island,25,335.3,57.58,Miliaria_calandra,Corn Bunting,Emberizidae,Passeriformes,0.49,122,0.008196721,4,58.5,cup
104,"Rinke, D. (1989). The reproductive biology of the Red Shining Parrot Prosopeia tabuensis on the island of ÔEua, Kingdom of Tonga.ÊIbis,Ê131(2), 238-249.",Island,3200,86.7,21.35,Prosopeia_tabuensis,Red Shining-Parrot,Psittadae,Psittaciformes,0.17,25,0.04,2.5,280,encolosed
109,"van Riper III, C. (1987). Breeding ecology of the Hawaii common amakihi.ÊCondor, 85-102.",Island,3846,10434,19.5,Hemignathus_virens,Hawaii Amakihi,Fringillidae,Passeriformes,0.368,23,0.043478261,2.5,13.35,cup
139,"Holt, D. W., Melvin, S. M., & Steele, B. (1992). Nestling growth rates of Short-eared Owls.ÊThe Wilson Bulletin, 326-333.",Island,16,130,41.28,Asio_flammeus,Short-Eared Owl,Strigidae,Strigiformes,0.287,22,0.045454545,7.5,350,cup
149,"Takagi, M. (2002). Reproductive Performance and Nestling Growth of the Brown Shrike Subspecies Lanius cristatus superciliosus in Hokkaido.ÊJournal of the Yamashina Institute for Ornithology,Ê34(1), 30-38.",Island,290,78719.4,43.13,Lanius_cristatus,Brown Shrike,Laniidae,Passeriformes,0.4,75,0.013333333,5,32,cup
185,"Ewen, J. G., Thorogood, R., Brekke, P., Cassey, P., Karadas, F., & Armstrong, D. P. (2009). Maternally invested carotenoids compensate costly ectoparasitism in the hihi.ÊProceedings of the National Academy of Sciences,Ê106(31), 12798-12802.",Island,3.4,2.2,36.6,Notiomystis_cincta,Stitchbird,Notiomystidae,Passeriformes,0.26,322,0.00310559,4,34,encolosed
202,"Moreno, J., Merino, S., V‡squez, R. A., & Armesto, J. J. (2005). Breeding biology of the thorn-tailed rayadito (Furnariidae) in south-temperate rainforests of Chile.ÊThe Condor,Ê107(1), 69-77.",Island,5,8477.5,41.52,Aphrastura_spinicauda,Thorn-tailed Rayadito,Furnaridae,Passeriformes,0.43,33,0.03030303,3.5,11.5,encolosed
214,"Paynter, R. A. (1954). Interrelations between clutch-size, brood-size, prefledging survival, and weight in Kent Island Tree Swallows.ÊBird-Banding,Ê25(2), 35-58.",Island,30.5,0.8,44.35,Tachycineta_bicolor,Tree Swallow,Hirundinidae,Passeriformes,0.53,23,0.043478261,5,21.25,encolosed
218,"Starck, J. M., & Ricklefs, R. E. (Eds.). (1998).ÊAvian growth and development: evolution within the altricial-precocial spectrum. Oxford University Press.",Island,250,230,26.65,Calliphlox_evelynae,Bahama Woodstar,Trochilidae,Apodiformes,0.408,2,0.5,2,2.9,cup
231,"Smith, J. N., Yom-Tov, Y., & Moses, R. (1982). Polygyny, male parental care, and sex ratio in song sparrows: an experimental study.ÊThe Auk, 555-564.",Island,46,0.1,48.63,Melospiza_melodia,Song Sparrow,Passerellidae,Passeriformes,0.47,20,0.05,3.5,32.45,cup
385,"Garnett, S. T., Pedler, L. P., & Crowley, G. M. (1999). The breeding biology of the glossy black-cockatoo Calyptorhynchus lathami on Kangaroo Island, South Australia.ÊEmu-Austral Ornithology,Ê99(4), 262-279.",Island,13.5,4405,35.5,Calyptorhynchus_lathami,Glossy Black-Cockatoo,Cacatuidae,Psittaciformes,0.097058824,34,0.029411765,1,450,encolosed
405,"Murton, R. K., Isaacson, A. J., & Westwood, N. J. (1963). The Food and Growth of Nestling Wood-Pigeons in Relation to the Breeding Season.ÊJournal of Zoology,Ê141(4), 747-781.",Island,35,209331.1,52.4,Columba_palumbus,Common Wood-Pigeon,Columbidae,Columbiformes,0.325,42,0.023809524,2,487,cup
762,"Butler, R. W., Verbeek, N. A., & Richardson, H. (1984). The breeding biology of the Northwestern Crow.ÊThe Wilson Bulletin, 408-418.",Island,15,1.5,49.57,Corvus_caurinus,Northwestern Crow,Corvidae,Passeriformes,0.298,62,0.016129032,4.5,399,cup
825,"Sogge, M. K., Kern, M. D., Kern, R., & van Riper, C. (1991). Growth and development of thermoregulation in nestling San Miguel Island Song Sparrows.ÊThe Condor,Ê93(3), 773-776.",Island,42,40.7,34.03,Melospiza_melodia,Song Sparrow,Passerellidae,Passeriformes,0.52,33,0.03030303,3.5,32.45,cup
858,"Picozzi, N. (1980). Food, growth, survival and sex ratio of nestling Hen Harriers Circus c. cyaneus in Orkney.ÊOrnis scandinavica, 1-11.",Island,500,539,59.03,Circus_cyaneus,Hen Herrier,Accipitridae,Accipitriformes,0.319,6,0.166666667,4.5,504,cup
859,"Scharf, W. C., & Balfour, E. (1971). Growth and development of nestling Hen Harriers.ÊIbis,Ê113(3), 323-329.",Island,500,539,59.03,Circus_cyaneus,Hen Herrier,Accipitridae,Accipitriformes,0.233,24,0.041666667,4.5,504,cup
884,"Robertson, H. A. (1988). Interspecific variation in growth of British pigeons Columbidae.ÊIbis,Ê130(2), 261-267.",Island,35,209331.1,51.45,Columba_livia,Rock Pigeon,Columbidae,Columbiformes,0.239705882,38,0.026315789,2,267.5,cup
884,"Robertson, H. A. (1988). Interspecific variation in growth of British pigeons Columbidae.ÊIbis,Ê130(2), 261-267.",Island,35,209331.1,51.45,Columba_oenas,Stock Dove,Columbidae,Columbiformes,0.470588235,82,0.012195122,2,325.5,cup
884,"Robertson, H. A. (1988). Interspecific variation in growth of British pigeons Columbidae.ÊIbis,Ê130(2), 261-267.",Island,35,209331.1,51.45,Columba_palumbus,Common Wood-Pigeon,Columbidae,Columbiformes,0.351,16,0.0625,2,487,cup
884,"Robertson, H. A. (1988). Interspecific variation in growth of British pigeons Columbidae.ÊIbis,Ê130(2), 261-267.",Island,35,209331.1,51.45,Streptopelia_decaocto,Eurasian Collared-Dove,Columbidae,Columbiformes,0.333823529,92,0.010869565,2,186,cup
891,"De Groot, R. S. (1983). Origin, status and ecology of the owls in Galapagos.ÊArdea,Ê71(2), 167-182.",Island,850,979.3,0.6,Asio_flammeus,Short-Eared Owl,Strigidae,Strigiformes,0.098529412,4,0.25,7.5,350,cup
896,"Benxiang, G. Y. Z. (1985). The breeding behaviour and population dynamics of the large White-rumped Swift, Apus pacificus (Latham), at Cheniushan Island in the Yellow Sea.ÊActa Zoologica Sinica,Ê1, 014.",Island,42,1,34.59,Apus_pacificus,Pacific Swift,Apodidae,Apodiformes,0.189,12,0.083333333,2,34.5,cup
913,"Arendt, W. J. (1985). Philornis ectoparasitism of Pearly-eyed Thrashers. II. Effects on adults and reproduction.ÊThe Auk, 281-292.",Island,700,9099.8,18.19,Margarops_fuscatus,Pearly-eyed Thrasher,Mimidae,Passeriformes,0.345,200,0.005,2.5,102.6,cup
914,"Frith, C. B., & Frith, D. W. (1990). Nesting biology and relationships of the Lesser Melampitta Melampitta lugubris.ÊEmu,Ê90(2), 65-73.",Island,155,785753,5.58,Melampitta_lugubris,Lesser Melampitta,Melampittidae,Passeriformes,0.198,4,0.25,1,30.5,encolosed
916,"Moreno, J. (1987). Nestling growth and brood reduction in the wheatear Oenanthe oenanthe.ÊOrnis Scandinavica, 302-309.",Island,2,1351.1,56.77,Oenanthe_oenanthe,Northern Wheatear,Muscicapidae,Passeriformes,0.502,47,0.021276596,6,25.5,cup
920,"Greig_Smith, P. (1985). Weight differences, brood reduction, and sibling competition among nestling stonechats Saxicola torquata (Aves: Turdidae).ÊJournal of Zoology,Ê205(3), 453-465.",Island,35,209331.1,50.97,Saxicola_torquatus,European Stonechat,Muscicapidae,Passeriformes,0.548,20,0.05,4.5,15,cup
931,"Ross, H. A. (1980). Growth of nestling Ipswich Sparrows in relation to season, habitat, brood size, and parental age.ÊThe Auk, 721-732.",Island,175,34,43.57,Passerculus_sandwichensis,Savannah Sparrow,Passerellidae,Passeriformes,0.642,596,0.001677852,4,22.75,cup
933,"Wiley, J. W. (1986). Growth of Shiny Cowbird and host chicks.ÊThe Wilson Bulletin,Ê98(1), 126-131.",Island,700,9099.8,18.19,Agelaius_xanthomus,Yellow-shouldered Blackbird,Icteridae,Passeriformes,0.391176471,23,0.043478261,3,38,cup
933,"Wiley, J. W. (1986). Growth of Shiny Cowbird and host chicks.ÊThe Wilson Bulletin,Ê98(1), 126-131.",Island,700,9099.8,18.19,Quiscalus_niger,Greater Antillean Grackle,Icteridae,Passeriformes,0.421,30,0.033333333,3.5,86,cup
938,"Frith, C. B. (1976).A twelve-month field study of the Aldabran Fody Foudia eminentissima aldabrana.ÊIbis,Ê118(2), 155-178.",Island,640,129.3,9.4,Foudia_eminentissima,Aldabdra Fody,Ploceidae,Passeriformes,0.401,13,0.076923077,2.5,24.5,encolosed
944,"Liljesthrom, M. (2011).ÊBiolog’a reproductiva de la golondrina patag—nica Tachycineta meyeni en Ushuaia, Tierra del Fuego(Doctoral dissertation, Facultad de Ciencias Exactas y Naturales. Universidad de Buenos Aires).",Island,4,47401.1,54.58,Tachycineta_meyeni,Chilean Swallow,Hirundinidae,Passeriformes,0.43,94,0.010638298,4.5,17.5,encolosed
